# Supplementary material for: Sensitive electrochemical detection of l-cysteine based on a highly stable Pd@Ti3C2Tx (MXene) nanocomposite modified glassy carbon electrode
Source: Royal Society of Chemistry journal article supplement (doi:10.1039/c9ay00912d), 2019-01-01
Supplement: c9ay00912d1.pdf [file c9ay00912d1.pdf]

**Electronic Supplementary material**

**Sensitive detection of L-Cysteine using highly stable  
Pd@Ti<sub>3</sub>C<sub>2</sub>T<sub>x</sub> (MXene) nanocomposite modified glassy  
carbon electrode**

P Abdul Rasheed, Ravi P Pandey, Khadeeja A Jabbar, Janarthanan Ponraj, Khaled A  
Mahmoud\*

*Qatar Environment and Energy Research Institute (QEERI), Hamad Bin Khalifa University  
(HBKU), P.O. Box 5825, Doha, Qatar*

\* To whom all correspondence should be addressed:

E-mail: kmahmoud@hbku.edu.qa, Fax: +974 445441528, Phone: +974 44541694

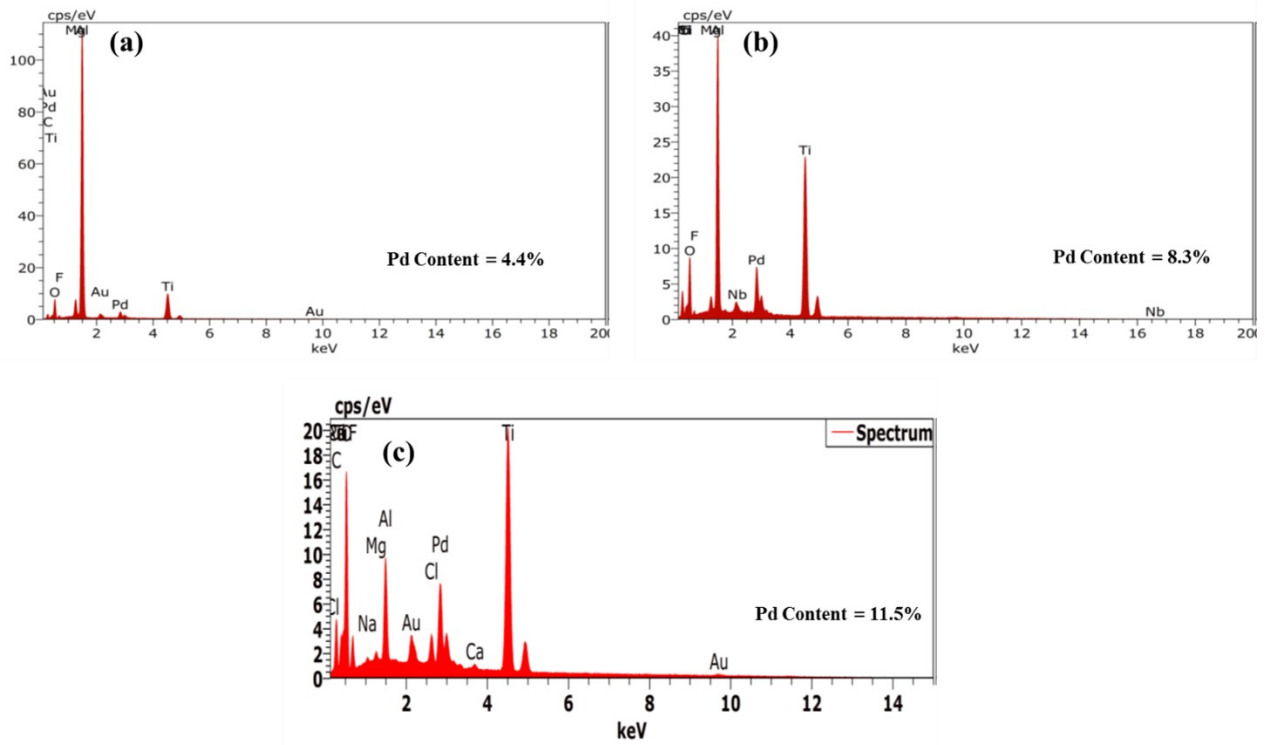

Fig. S1. EDS spectra of (a) 10%Pd@Ti<sub>3</sub>C<sub>2</sub>T<sub>x</sub>, (b) 20%Pd@Ti<sub>3</sub>C<sub>2</sub>T<sub>x</sub> and (c) 20%Pd@Ti<sub>3</sub>C<sub>2</sub>T<sub>x</sub> composites

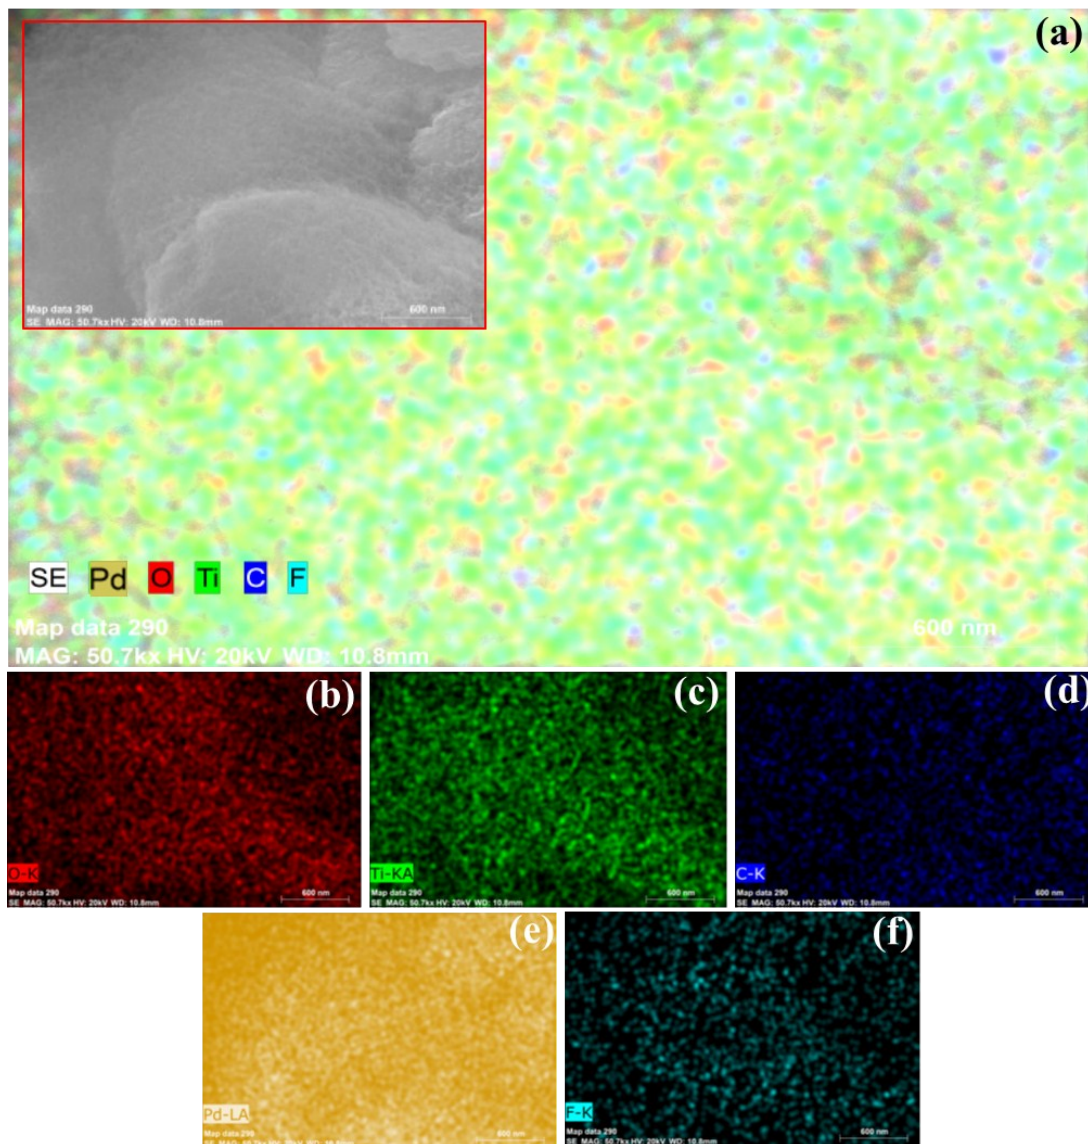

Figure S2. (a) Energy dispersive spectroscopy (EDS) elemental mix mapping image of Pd@Ti<sub>3</sub>C<sub>2</sub>T<sub>x</sub> composite. Inset shows the SEM image of Pd@Ti<sub>3</sub>C<sub>2</sub>T<sub>x</sub> composite; (b-f) Energy dispersive spectroscopy EDS elemental mapping of Pd@Ti<sub>3</sub>C<sub>2</sub>T<sub>x</sub> composite with separate elements.

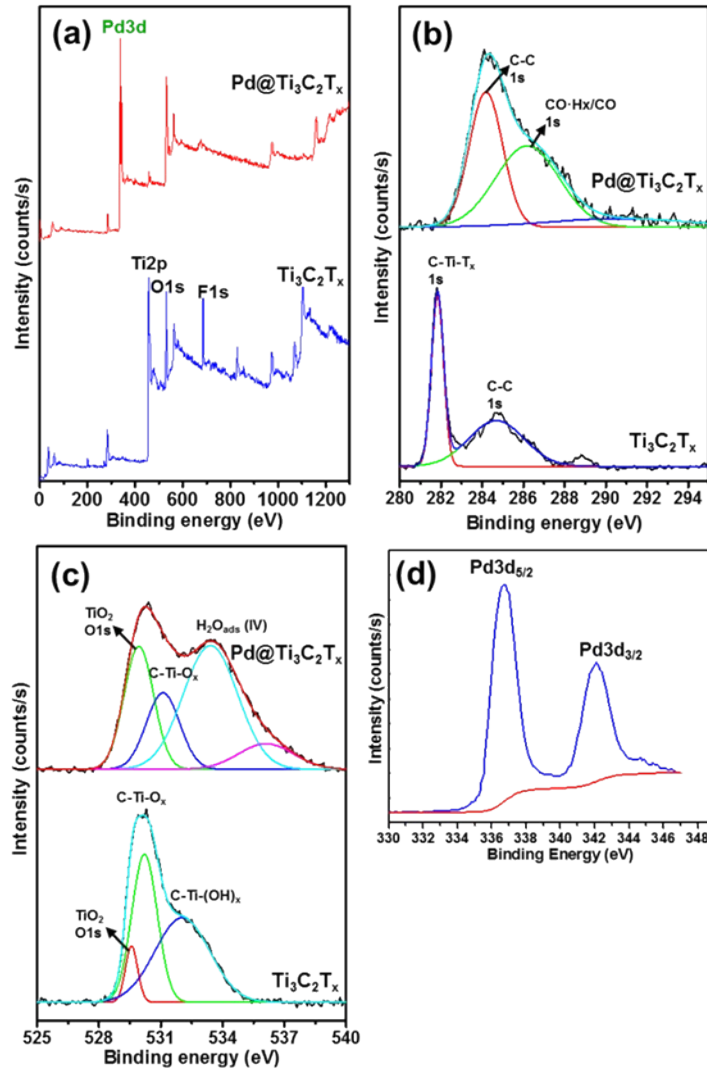

Fig. S3. (a), XPS survey spectra for Ti<sub>3</sub>C<sub>2</sub>T<sub>x</sub> and Pd@Ti<sub>3</sub>C<sub>2</sub>T<sub>x</sub>; (b) high resolution XPS spectrum for C 1s; (c) high resolution XPS spectrum for O 1s for Ti<sub>3</sub>C<sub>2</sub>T<sub>x</sub> and Pd@Ti<sub>3</sub>C<sub>2</sub>T<sub>x</sub>; and (d) high resolution XPS spectrum of Pd 3d for the Pd@Ti<sub>3</sub>C<sub>2</sub>T<sub>x</sub>.

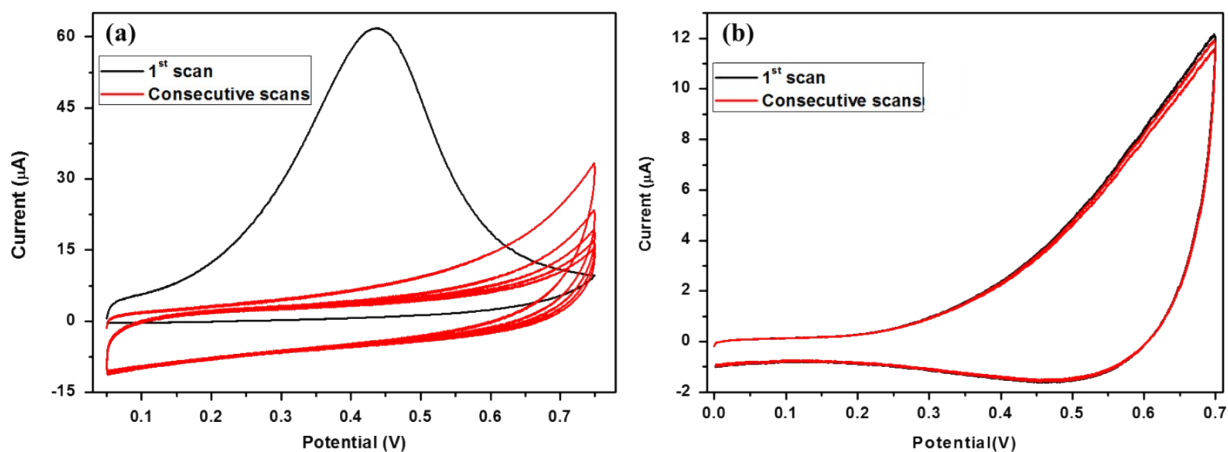

Fig. S4. (a) Cyclic voltammogram of  $\text{Ti}_3\text{C}_2\text{T}_x/\text{GCE}$  showing several consecutive scans run in a potential window from 0 V to 0.8 V at a sweep rate of  $100 \text{ mV s}^{-1}$  in 0.1 M PB (pH 7.0). (b) Cyclic voltammogram of 20%Pd@ $\text{Ti}_3\text{C}_2\text{T}_x/\text{GCE}$  showing several consecutive scans run in a potential window from 0 V to 0.7 V at a sweep rate of  $100 \text{ mV s}^{-1}$  in 0.1 M PBS (pH 7.0).

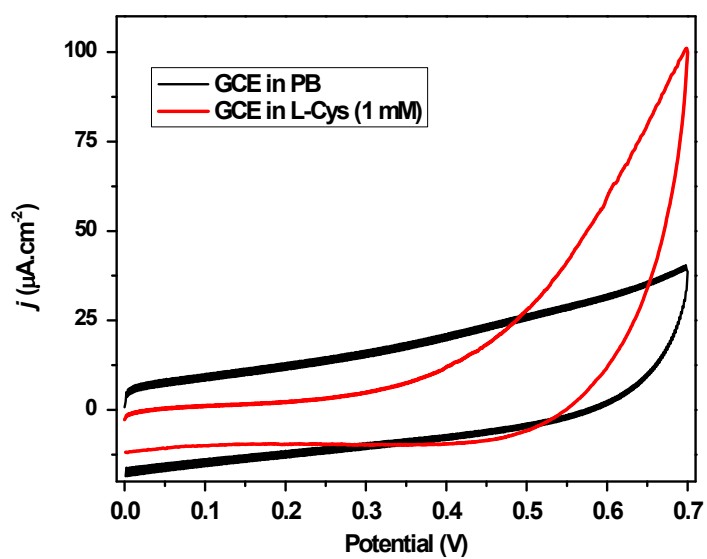

Fig. S5. Cyclic voltammogram of bare GCE in absence and presence of 1 mM L-Cys.

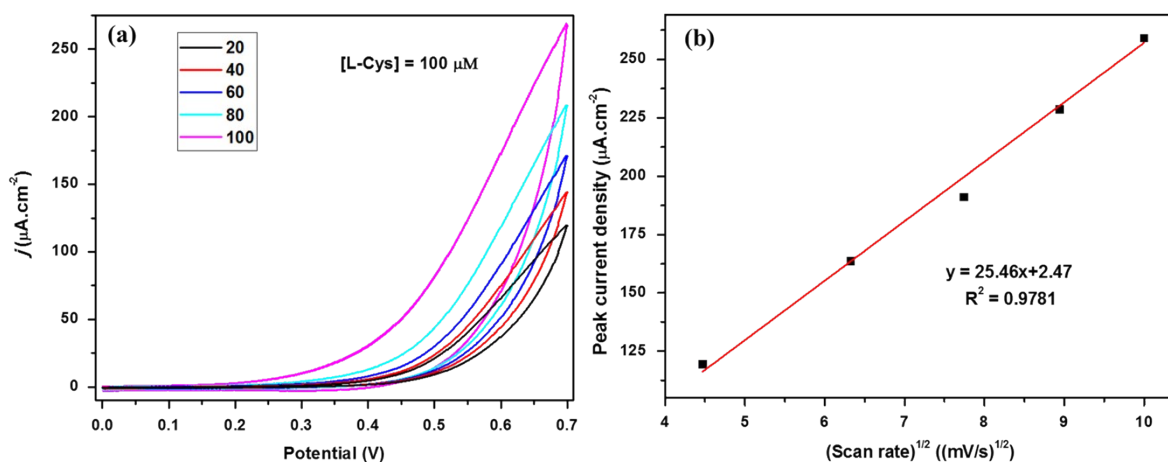

Fig. S6. (a) Cyclic voltammogram of 20%Pd@Ti<sub>3</sub>C<sub>2</sub>T<sub>x</sub>/GCE modified electrode in 0.1 M PB (pH 7) with the presence of 100  $\mu\text{M}$  L-Cys scanning at different scan rates. (b) Plot of peak current as a function of scan rate ranging from 20 to 100  $\text{mV}\cdot\text{s}^{-1}$ .

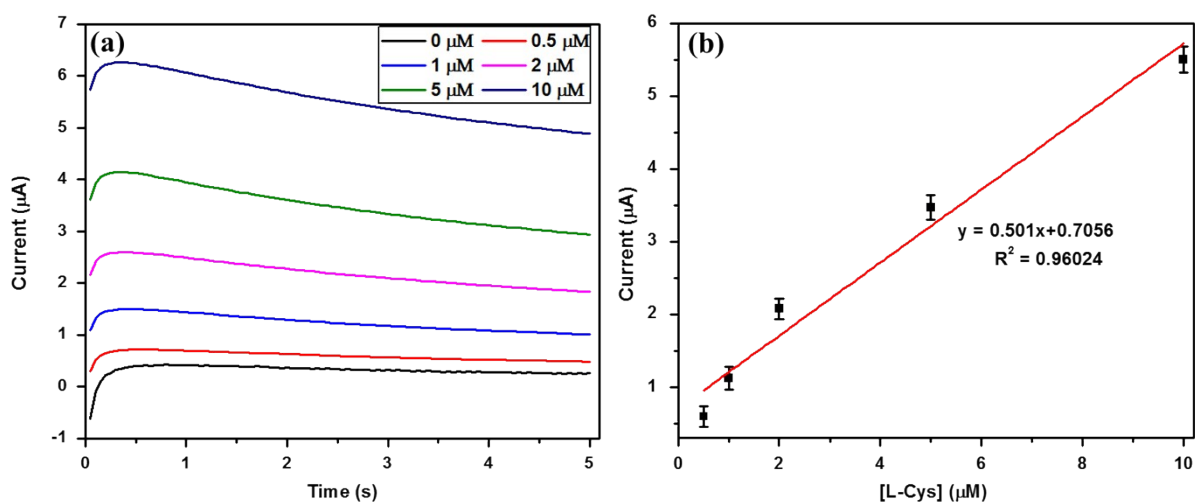

Fig. S7. (a) Chronoamperometric response of 20%Pd@Ti<sub>3</sub>C<sub>2</sub>T<sub>x</sub>/GCE electrode with different concentrations of L-Cys at +0.6V. (b) Plot of current vs molar concentration. The error bar indicates the standard deviation from the three independent measurements.

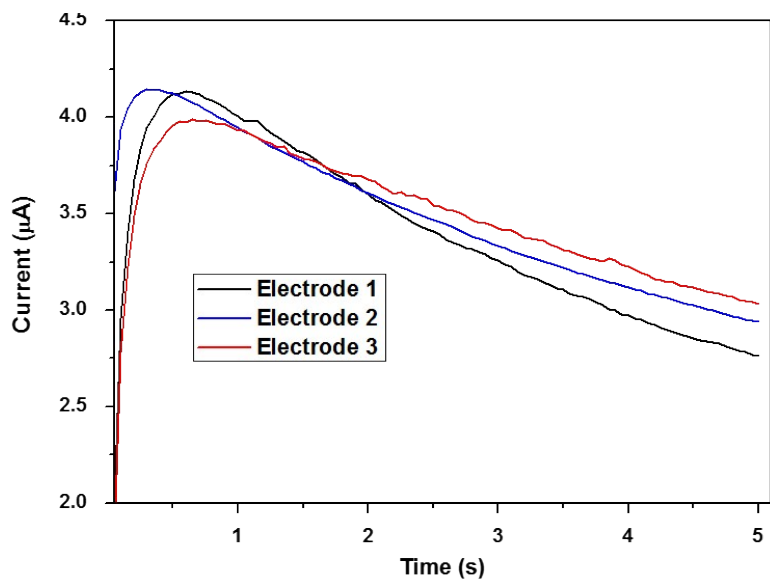

Fig. S8. Chronoamperometric curves of three different 20%Pd@Ti<sub>3</sub>C<sub>2</sub>T<sub>x</sub>/GCE with 5 μM L-Cys showing the repeatability of the sensor.

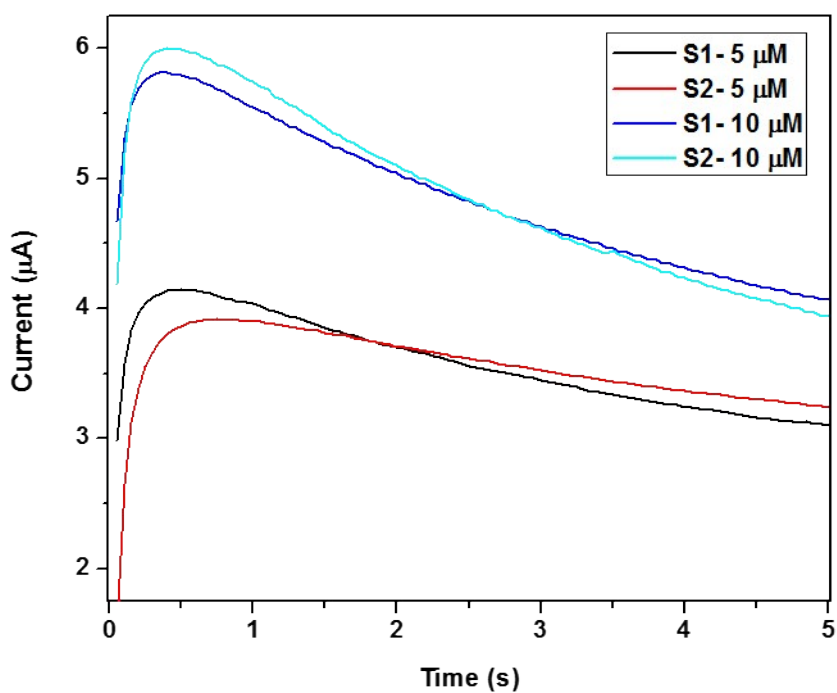

Fig. S9. Chronoamperometric response of 20%Pd@Ti<sub>3</sub>C<sub>2</sub>T<sub>x</sub>/GCE electrode with different concentrations of L-Cys spiked in human urine.

**Table S1:** Recovery of L-Cys in human urine samples by using the 20%Pd@Ti<sub>3</sub>C<sub>2</sub>T<sub>x</sub>/GCE.

| <i>Samples</i> | <i>L-Cys added</i><br>( $\mu$ M) | <i>L-Cys detected</i><br>( $\mu$ M) | <i>Recovery (%)</i> | <i>RSD (%)</i> |
|----------------|----------------------------------|-------------------------------------|---------------------|----------------|
| <b>S1</b>      | 5                                | 4.67                                | 93.57               | 2.6            |
|                | 10                               | 9.54                                | 95.43               | 3.83           |
| <b>S2</b>      | 5                                | 5.17                                | 103.4               | 4.16           |
|                | 10                               | 9.64                                | 96.95               | 4.72           |
